# Supplementary material
Source: PubMed Central journal article supplement (PMC549493)
Supplement: pnas_102_8_2784__1.pdf [file pnas_102_8_2784__1.pdf]

```

Exoc7 MIPPQEASARRREIEDKLKQEEETLSFIRDSLEKSDQLTKNMVSISSFESRLMKLENSI 60
Exo70 MIPPQEASARRREIEDKLKQEEETLSFIRDSLEKSDQLTKNMVSISSFESRLMKLENSI 60
2-5-3 -----SSFESRLMKLENSI 14
*****

Exoc7 IPVHKQTENLQRLQENVEKTLSCLDHVISYYHVASDTEKIIREGPTGRLEEYLGSMKIQ 120
Exo70 IPVHKQTENLQRLQENVEKTLSCLDHVISYYHVASDTEKIIREGPTGRLEEYLGSMKIQ 120
2-5-3 IPVHKQTENLQRLQENVEKTLSCLDHVISYYHVASDTEKIIREGPTGRLEEYLGSMKIQ 74
*****

Exoc7 KAVEYFQDNPSDPELNKVKLLFERGKEALESEFRSLMTRHSKVVSPVLILDLSGDDDL 180
Exo70 KAVEYFQDNPSDPELNKVKLLFERGKEALESEFRSLMTRHSKVVSPVLILDLSGDDDL 180
2-5-3 KAVEYFQDNPSDPELNKVKLLFERGKEALESEFRSLMTRHSKVVSPVLILDLSGDDDL 134
*****

Exoc7 EAQEDVTLEHLPESVLQDVIRISRWLVEYGRNQDFMNVYQIRSSQLDRSIKGLKEHFK 240
Exo70 EAQEDVTLEHLPESVLQDVIRISRWLVEYGRNQDFMNVYQIRSSQLDRSIKGLKEHFK 240
2-5-3 EAQEDVTLEHLPESVLQDVIRISRWLVEYGRNQDFMNVYQIRSSQLDRSIKGLKEHFK 194
*****

Exoc7 SSSSSGVPYSPAI PNKRKDTPTKKPVKRPGTIRKAQNLLKQYSQHGLDGKKGGSNLIPL 300
Exo70 SSSSSGVPYSPAI PNKRKDTPTKKPVKRPGTIRKAQNLLKQYSQHGLDGKKGGSNLIPL 300
2-5-3 SSSSSGVPYSPAI PNKRKDTPTKKPVKRPGTIRKAQNLLKQYSQHGLDGKKGGSNLIPL 254
*****

Exoc7 GLLPCTPRGGLPGPWINAACVCAADISPGHEHDFRVKHLSEALNDKHGPLAGRDDMLDVE 360
Exo70 -----GRDDMLDVE 309
2-5-3 -----GRDDMLDVE 263
*****

Exoc7 TDAYIHCVSFAFVKLAQSEYQLLADI IPEHHQKKTFDLSIQDALDGLMLEGENI VSAARKA 420
Exo70 TDAYIHCVSFAFVKLAQSEYQLLADI IPEHHQKKTFDLSIQDALDGLMLEGENI VSAARKA 369
2-5-3 TDAYIHCVSFAFVKLAQSEYQLLADI IPEHHQKKTFDLSIQDALDGLMLEGENI VSAARKA 323
*****

Exoc7 IVRHDFSTVLTVPFPI LRHLKQTKPEFDQVLQGTAASTKNKLPGLITSMETIGAKALEDFA 480
Exo70 IVRHDFSTVLTVPFPI LRHLKQTKPEFDQVLQGTAASTKNKLPGLITSMETIGAKALEDFA 429
2-5-3 IVRHDFSTVLTVPFPI LRHLKQTKPEFDQVLQGTAASTKNKLPGLITSMETIGAKALEDFA 383
*****

Exoc7 DNIKNPDKEYNMPKDGTVHELTSNAILFLQQLLDFQETAGAMLASQETSSSATSYSSEF 540
Exo70 DNIKNPDKEYNMPKDGTVHELTSNAILFLQQLLDFQETAGAMLASQETSSSATSYSSEF 489
2-5-3 DNIKNPDKEYNMPKDGTVHELTSNAILFLQQLLDFQETAGAMLASQG----- 431
*****

Exoc7 SKRLLSTYICKVLGNLQLNLLSKSKVYEDPALSAIFLHNNYNYILKSLEKSELIQLVAVT 600
Exo70 SKRLLSTYICKVLGNLQLNLLSKSKVYEDPALSAIFLHNNYNYILKSLEKSELIQLVAVT 549
2-5-3 -----KVLGNLQLNLLSKSKVYEDPALSAIFLHNNYNYILKSLEKSELIQLVAVT 481
*****

Exoc7 QKTAERSYREHIEQQIQTYQRSWLKVTDYIAEKNLPVFPQGVKLRDKERQIIKERFKGFN 660
Exo70 QKTAERSYREHIEQQIQTYQRSWLKVTDYIAEKNLPVFPQGVKLRDKERQIIKERFKGFN 609
2-5-3 QKTAERSYREHIEQQIQTYQRSWLKVTDYIAEKNLPVFPQGVKLRDKERQIIKERFKGFN 541
*****

Exoc7 DGLEELCKIQKAWAIPDTEQRDRIRQAQKTIVKETYGAFQKFGSVPFTKNPEKYIKYGV 720
Exo70 DGLEELCKIQKAWAIPDTEQRDRIRQAQKTIVKETYGAFQKFGSVPFTKNPEKYIKYGV 669
2-5-3 DGLEELCKIQKAWAIPDTEQRDRIRQAQKTIVKETYGAFQKFGSVPFTKNPEKYIKYGV 601
*****

Exoc7 EQVGMIDRLFD TSA 735
Exo70 EQVGMIDRLFD TSA 684
2-5-3 EQVGMIDRLFD TSA 616
*****

```
